# Supplementary material
Source: HighWire-hosted journal article supplement (https://gut.bmj.com/content/71/8/1600)
Supplement: inline-supplementary-material-5 [file inline-supplementary-material-5.pdf]

# Supplementary Figures for

## “Patients with mesenchymal tumours and high *Fusobacteriales* prevalence have worse prognosis in colorectal cancer (CRC)”

Manuela Salvucci<sup>1</sup>, Nyree Crawford<sup>2</sup>, Katie Stott<sup>2</sup>, Susan Bullman<sup>3,4</sup>, Daniel B. Longley<sup>2</sup>, and  
Jochen H.M. Prehn<sup>1\*</sup>

<sup>1</sup>Centre for Systems Medicine, Department of Physiology and Medical Physics, Royal College of Surgeons in Ireland, Dublin, Ireland;

<sup>2</sup>Patrick G. Johnston Centre for Cancer Research, School of Medicine, Dentistry and Biomedical Science, Queen’s University Belfast, Northern Ireland, UK;

<sup>3</sup>Dana-Farber Cancer Institute, Harvard Medical School, Boston, USA;

<sup>4</sup>Fred Hutchinson Cancer Research Center, Human Biology Division, Seattle, USA.

**Corresponding author:** Prof. Jochen H. M. Prehn, Department of Physiology and Medical Physics, Royal College of Surgeons in Ireland, 123 St. Stephen’s Green, Dublin 2, Ireland. Tel.: +353-1-402-2255; Fax: +353-1-402-2447; E-mail: [jprehn@rcsi.ie](mailto:jprehn@rcsi.ie).

**Data and code availability:** Datasets and source code will be publicly available and archived upon publication at Zenodo (<https://10.5281/zenodo.4019142>).

Transcriptomic-dependent *Fn/Fusobacteriales* impact.

## Supplementary Figure 1.

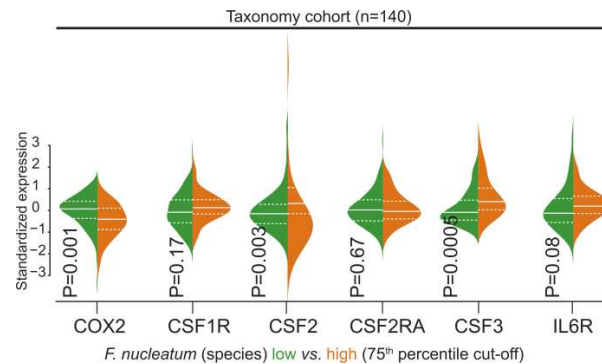**Association between *Fn* load and inflammation signalling in the human host.**

Distribution of key player genes grouped by *Fn* (high vs. low, using the 75<sup>th</sup> percentile as cut-off) for patients of the Taxonomy cohort.

Median and lower (25<sup>th</sup>) and upper (75<sup>th</sup>) percentiles are indicated by white solid or dashed lines, respectively. Statistical significance was evaluated Kruskal-Wallis tests and P-values are reported.

Transcriptomic-dependent *Fn/Fusobacteriales* impact.

Supplementary Figure 2.

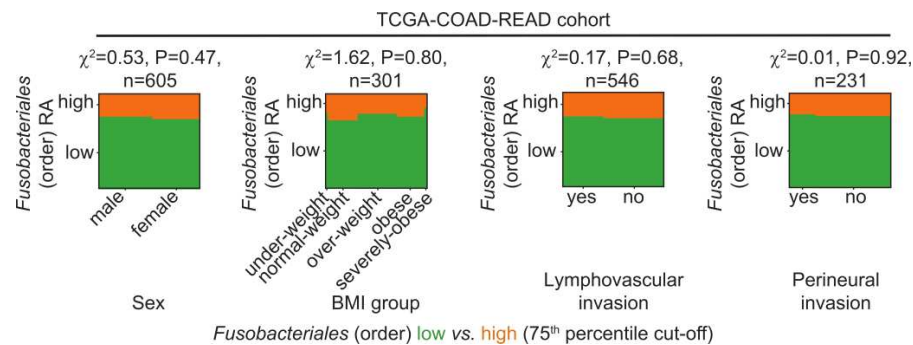

Association between *Fusobacteriales* relative abundance (RA) and human host clinico-pathological features in the TCGA-COAD-READ cohort.

Mosaic plots depicting the relationship between categorical clinico-pathological characteristics of the human host and *Fusobacteriales* RA. Patients were classified as *Fusobacteriales*-low or -high using the 75<sup>th</sup> percentile as cut-off and indicated in green and orange, respectively. Statistical significance was evaluated with  $\chi^2$  independence tests and the  $\chi^2$  test statistic and the mod-log-likelihood P-values are reported.

**Abbreviations.** BMI: body mass index.

Transcriptomic-dependent *Fn/Fusobacteriales* impact.

Supplementary Figure 3.

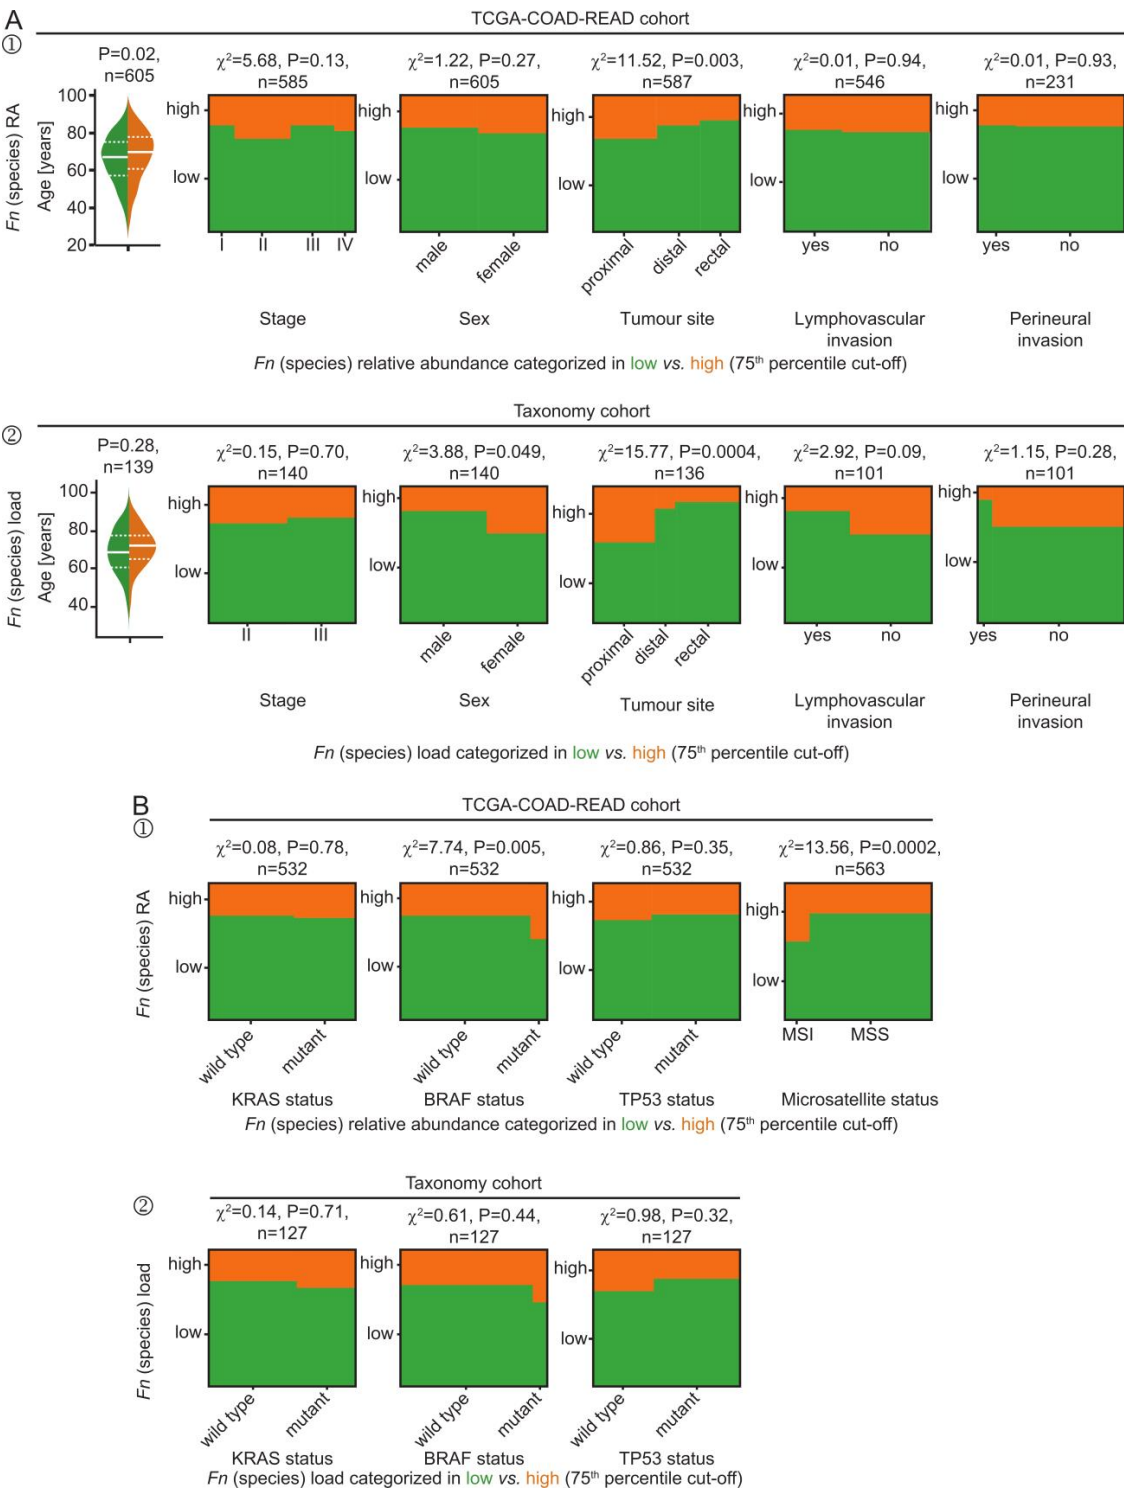

Salvucci et al.

Transcriptomic-dependent *Fn/Fusobacteriales* impact.

***Association between human host clinico-pathological (A) and mutational (B) features in Fn-low vs. high patients of the TCGA-COAD-READ (1) and Taxonomy (2) cohorts.***

*Fn* is expressed as relative abundance (RA) for patients of the TCGA-COAD-READ cohort or load for patients of the in-house Taxonomy cohort. Patients were categorised in low vs. high subgroups using the 75<sup>th</sup> percentile as cut-off and indicated in green and orange, respectively. Association between *Fn* and continuous variables is depicted with violin plots, median and lower (25<sup>th</sup>) and upper (75<sup>th</sup>) percentiles are indicated by white solid or dashed lines, respectively. Statistical significance was evaluated Kruskal-Wallis tests and P-values are reported. Association between *Fn* and categorical clinico-pathological characteristics is depicted with mosaic plots and statistical significance was evaluated with  $\chi^2$  independence tests and the  $\chi^2$  test statistic and the mod-loglikelihood P-values are reported.

Salvucci et al.

Transcriptomic-dependent *Fn/Fusobacteriales* impact.

Supplementary Figure 4.

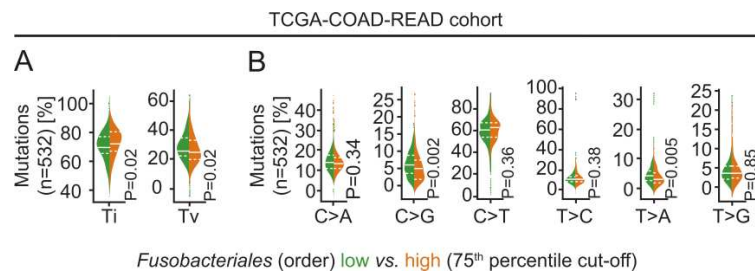

*Association between Fusobacteriales relative abundance (RA) and DNA substitution mutations in the patients of TCGA-COAD-READ cohort.*

**A-B.** Distribution of transitions (Ti) and transversions (Tv) (**A**) and conversion changes (**B**) in patients of the TCGA-COAD-READ cohort classified as *Fusobacteriales*-low (in green) or -high (in orange) based on a 75<sup>th</sup> percentile cut-off. Median and lower (25<sup>th</sup>) and upper (75<sup>th</sup>) percentiles are indicated by white solid or dashed lines, respectively. Statistical significance was evaluated Kruskal-Wallis tests and P-values are reported.

Transcriptomic-dependent *Fn/Fusobacteriales* impact.

Supplementary Figure 5.

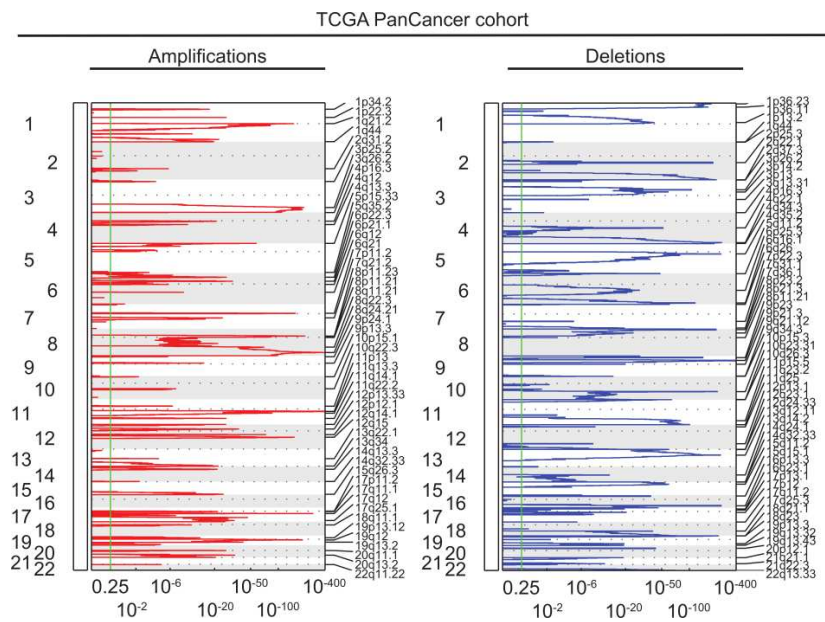

Recurrent copy number alterations in patients of the TCGA PanCancer cohort.

Amplifications (in red, left hand-side) and deletions (in blue, right hand-side) computed by GISTIC2 analysis to detect recurrent copy number alterations in the TCGA PanCancer cohort (n=9142).

Chromosome bands are indicated (y axis) and cytobands that reached statistical significance (as indicated by q-values) are shown.

Transcriptomic-dependent *Fn/Fusobacteriales* impact.

## Supplementary Figure 6.

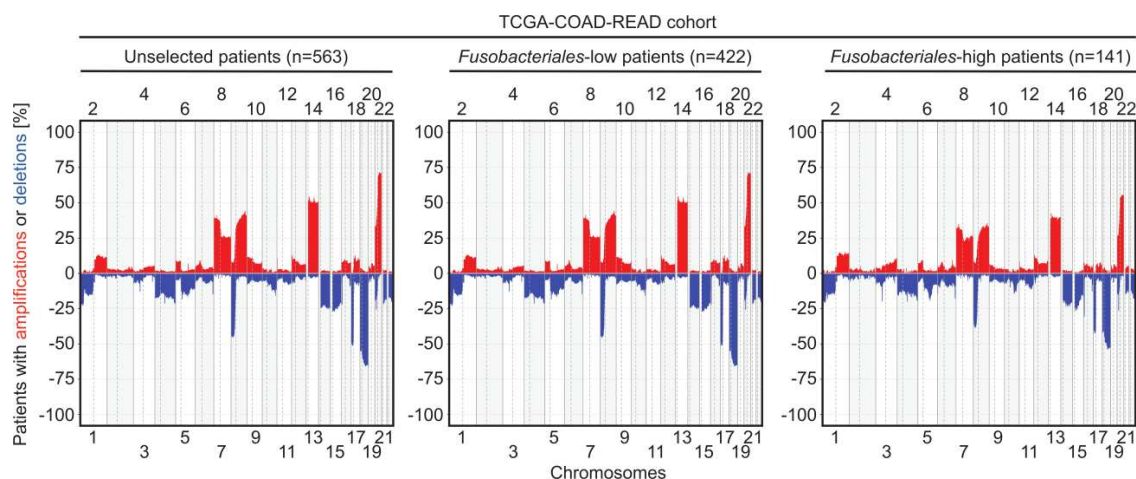***Frequency of copy number alterations in patients of the TCGA-COAD-READ cohort.***

Frequency of occurrence of copy number amplifications (in red) or deletions (in blue) by chromosome in the whole unselected cohort (left panel) and in subgroups restricted to cases with low- (middle panel) or high- (right panel) *Fusobacteriales* relative abundance for patients of the TCGA-COAD-READ cohort.



Transcriptomic-dependent *Fn/Fusobacteriales* impact.

Supplementary Figure 7.

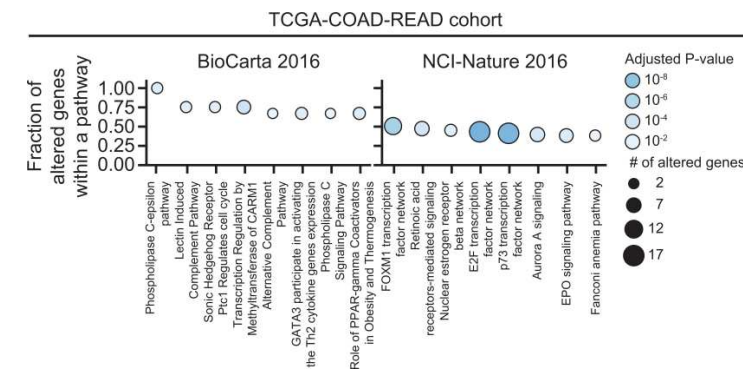

*Pathway enrichment analysis for genes differentially expressed by Fusobacteriales relative abundance (RA) in patients of the TCGA-COAD-READ cohort.*

Enrichment analysis on genes identified as differentially expressed by *Fusobacteriales* RA in patients of the TCGA-COAD READ cohort. Analysis was performed with *EnrichR* querying the *BioCarta* (version 2016) and *NCI-Nature* (version 2016) pathway databases. The number of identified altered genes for each pathway is encoded by the marker size and the magnitude of the associated P-values is color-coded, as indicated in the legend.

Transcriptomic-dependent *Fn/Fusobacteriales* impact.

Supplementary Figure 8.

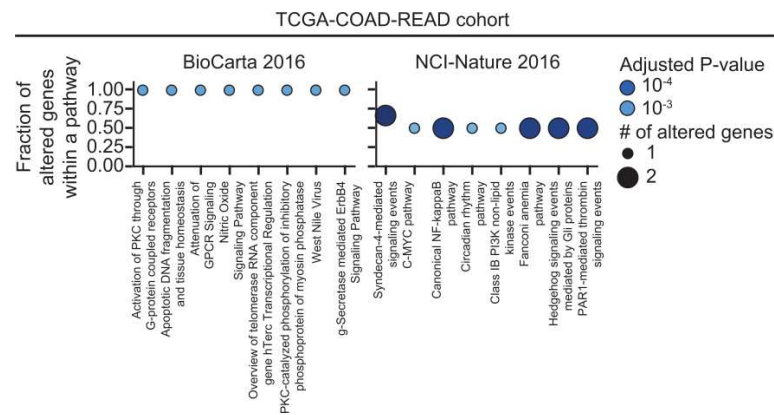

Pathway enrichment analysis for proteins differentially expressed by *Fusobacteriales* relative abundance (RA) in patients of the TCGA-COAD-READ cohort.

Enrichment analysis on proteins identified as differentially expressed by *Fusobacteriales* RA in patients of the TCGA-COAD READ cohort. Analysis was performed with *EnrichR* querying the *BioCarta* (version 2016) and *NCI-Nature* (version 2016) pathway databases. The number of identified altered genes for each pathway is encoded by the marker size and the magnitude of the associated P-values is color-coded, as indicated in the legend.

Transcriptomic-dependent *Fn/Fusobacteriales* impact.

## Supplementary Figure 9.

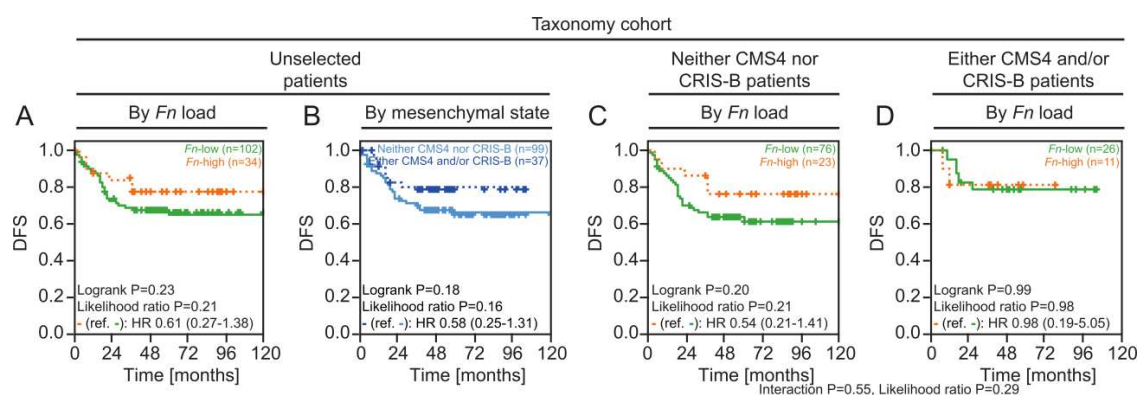

Kaplan-Meier plots comparing disease-free-survival (DFS) in patients of the Taxonomy cohort grouped by *Fn* load (A), mesenchymal status (B) and by *Fn* load within the non-mesenchymal and mesenchymal patients' subpopulations (C-D). Patients were categorised in *Fn*-low or -high subgroups using the 75<sup>th</sup> percentile as cut-off. *Consensus Molecular Subtype* (CMS) and *Cancer Intrinsic Subtype* (CRIS) assignments were used to categorise patients in non-mesenchymal ("Neither CMS4 nor CRIS-B") or mesenchymal, respectively ("Either CMS4 and/or CRIS-B").

Transcriptomic-dependent *Fn/Fusobacteriales* impact.

## Supplementary Figure 10.

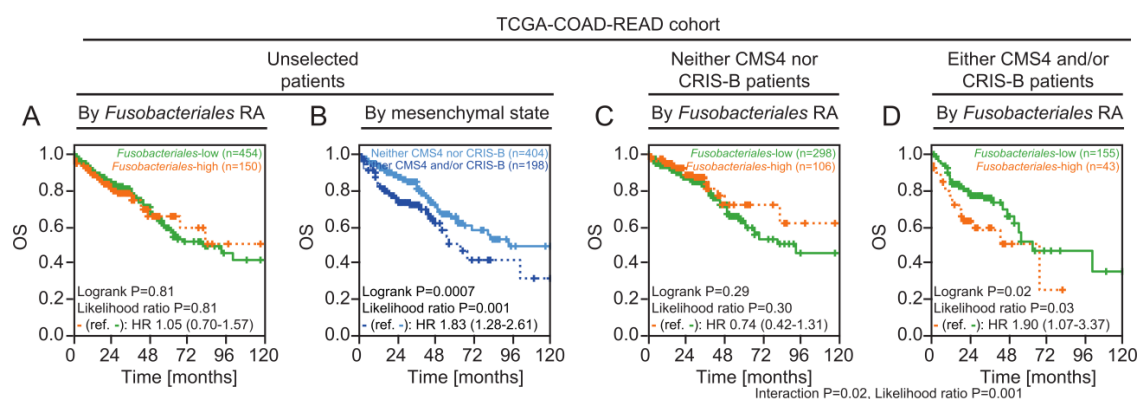

Kaplan-Meier plots comparing overall survival (OS) in patients of the TCGA-COAD-READ cohort grouped by *Fusobacteriales* RA (**A**), mesenchymal status (**B**) and by *Fusobacteriales* RA within the non-mesenchymal and mesenchymal patients' subpopulations (**C-D**). Patients were categorised in *Fusobacteriales*-low or -high subgroups using the 75<sup>th</sup> percentile as cut-off. *Consensus Molecular Subtype* (CMS) and *Cancer Intrinsic Subtype* (CRIS) assignments were used to categorise patients in non-mesenchymal ("Neither CMS4 nor CRIS-B") or mesenchymal, respectively ("Either CMS4 and/or CRIS-B").

Transcriptomic-dependent *Fn/Fusobacteriales* impact.

Supplementary Figure 11.

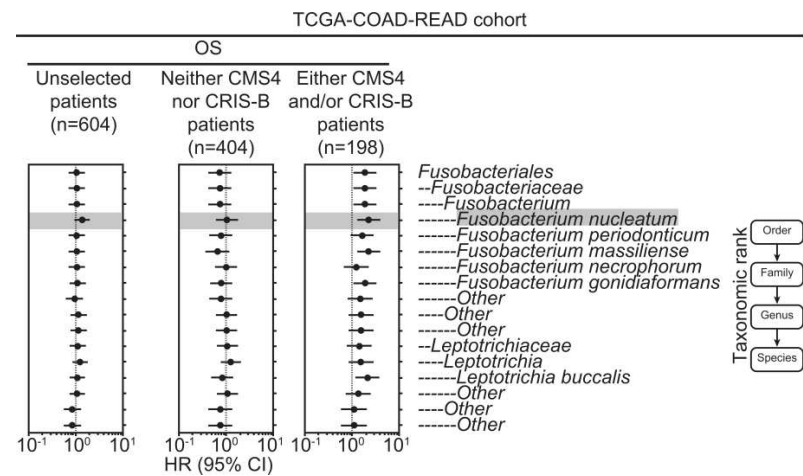

Cox regression models fitted on bacterium relative abundance reported at the order, family, genus, and species taxonomic ranks. For each taxonomic rank, patients were binned into -low or -high subgroups using the corresponding 75<sup>th</sup> percentile RA as cut-off. Univariate Cox regression models were fitted when evaluating association between bacterium subgroup (high vs. low; reference low) at each taxonomic rank and OS in the whole unselected patient population (left panel). Cox regression models with an interaction term between bacterium subgroup (high vs. low; reference low) and mesenchymal status (mesenchymal, i.e either CMS4 and/or CRIS-B, vs. non-mesenchymal, i. e. neither CMS4 nor CRIS-B) at each taxonomic rank and OS were fitted to evaluate differential impact of bacterium on clinical outcome by tumour biology (right panels).

Transcriptomic-dependent *Fn/Fusobacteriales* impact.

Supplementary Figure 12.

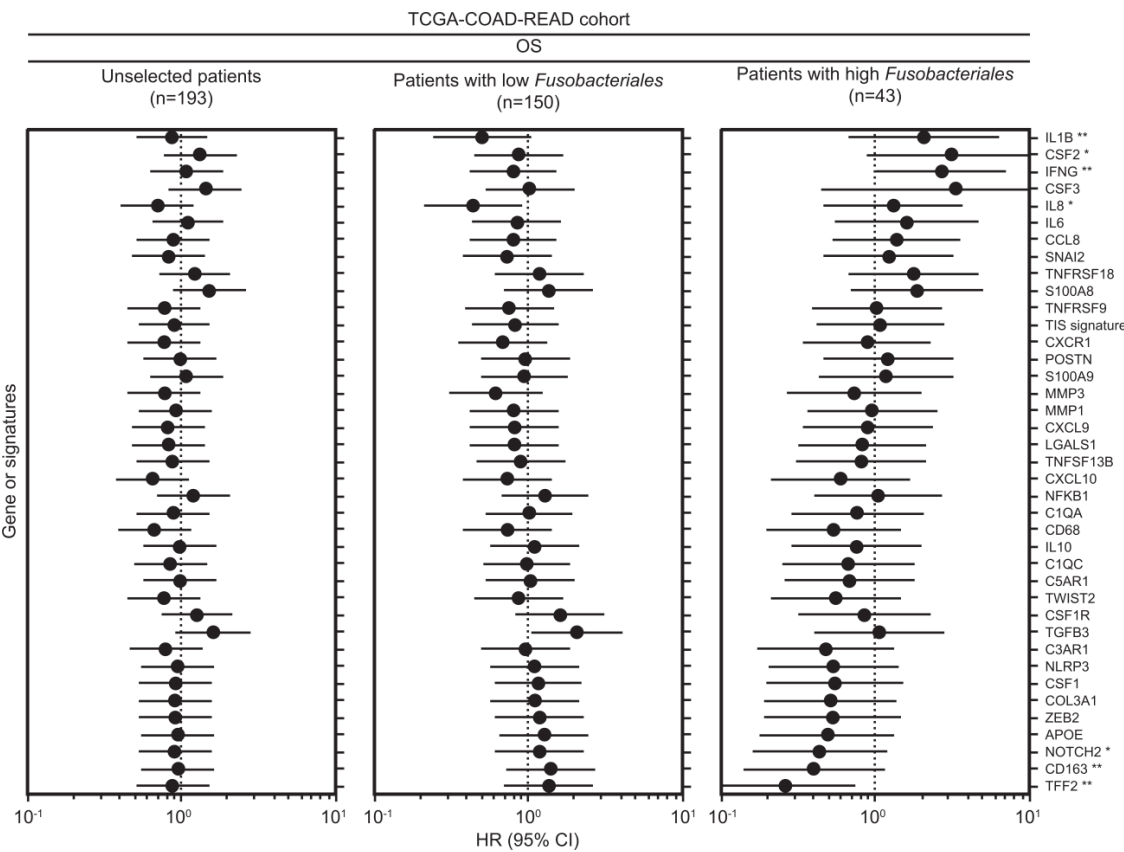

Cox regression models fitted on patients of the TCGA-COAD-READ cohort with mesenchymal tumours (either CMS4 and/or CRIS-B) for each gene/signature identified from analysis presented in **Fig. 6A**. Patients were classified as *Fusobacteriales*-low or high using the corresponding 75<sup>th</sup> percentile relative abundance (RA) as cut-off. Univariate Cox regression models were fitted when evaluating association between *Fusobacteriales* (high vs. low; reference low) and OS in the whole unselected patient population (left panel). Cox regression models with an interaction term between *Fusobacteriales* (high vs. low; reference low) and gene/signature (high vs. low, reference low) and OS were fitted to evaluate differential impact of gene/signature on clinical outcome by

Salvucci et al.

Transcriptomic-dependent *Fn/Fusobacteriales* impact.

*Fusobacteriales* (right panels). \* and \*\* denote interaction P-values lower than 0.05 and lower than or equal to 0.1, respectively.

Salvucci et al.

Transcriptomic-dependent *Fn/Fusobacteriales* impact.

Supplementary Figure 13.

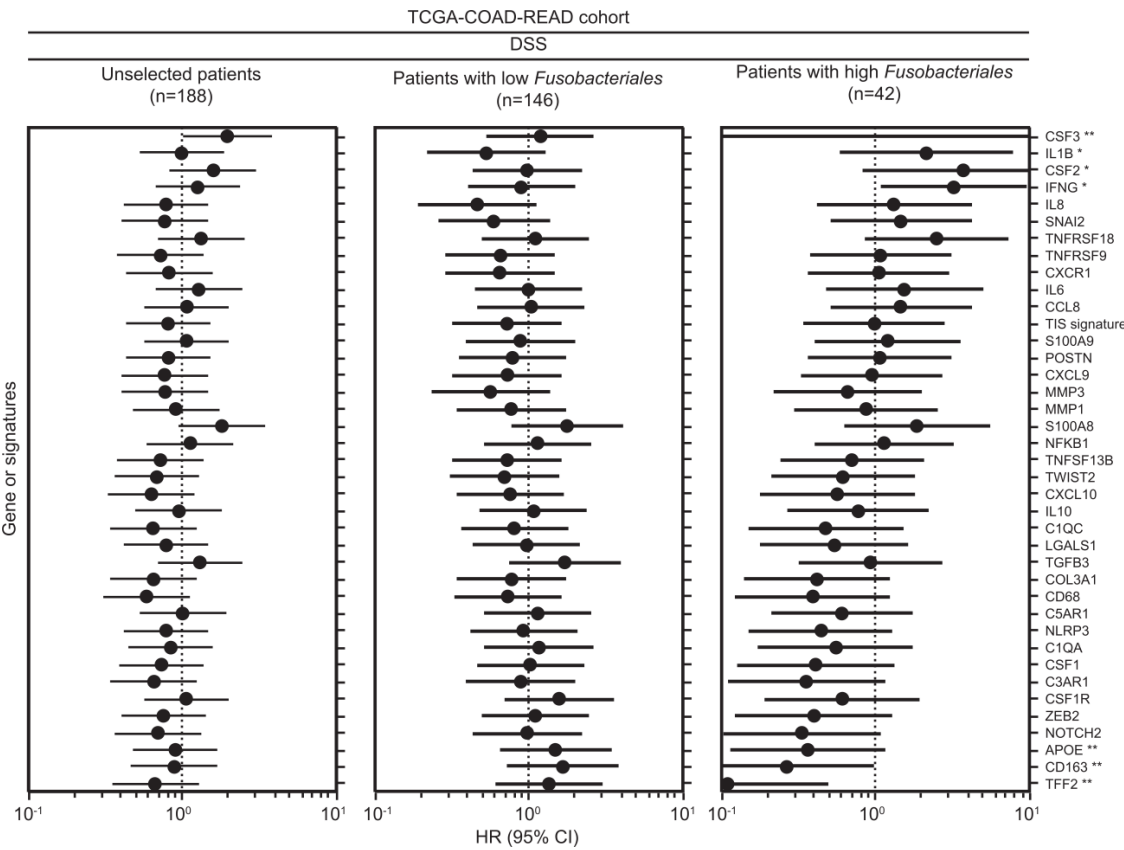

Cox regression models fitted on patients of the TCGA-COAD-READ cohort with mesenchymal tumours (either CMS4 and/or CRIS-B) for each gene/signature identified from analysis presented in **Fig. 6A**. Patients were classified as *Fusobacteriales*-low or high using the corresponding 75<sup>th</sup> percentile relative abundance (RA) as cut-off. Univariate Cox regression models were fitted when evaluating association between *Fusobacteriales* (high vs. low; reference low) and DSS in the whole unselected patient population (left panel). Cox regression models with an interaction term between *Fusobacteriales* (high vs. low; reference low) and gene/signature (high vs. low, reference low) and DSS were fitted to evaluate differential impact of gene/signature on clinical outcome by



Transcriptomic-dependent *Fn/Fusobacteriales* impact.

*Fusobacteriales* (right panels). \* and \*\* denote interaction P-values lower than 0.05 and lower than or equal to 0.1, respectively.

Salvucci et al.

Transcriptomic-dependent *Fn/Fusobacteriales* impact.

Supplementary Figure 14.

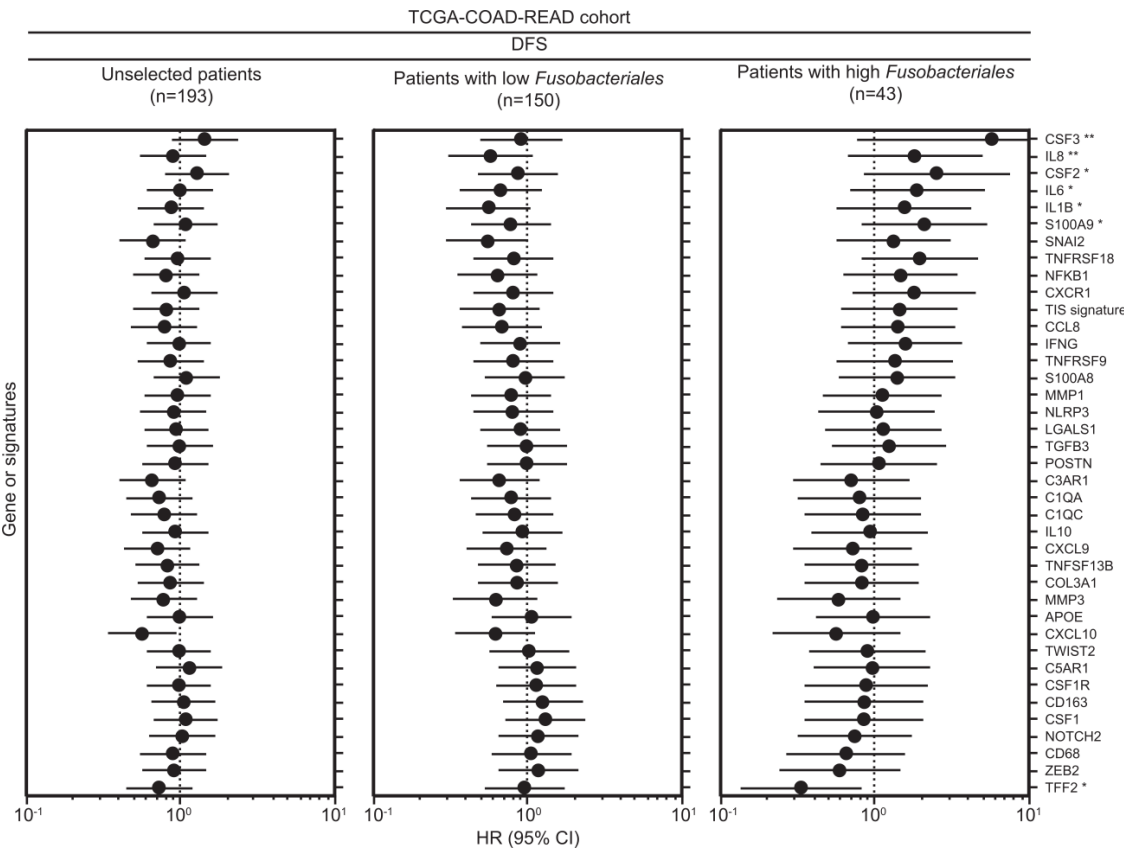

Cox regression models fitted on patients of the TCGA-COAD-READ cohort with mesenchymal tumours (either CMS4 and/or CRIS-B) for each gene/signature identified from analysis presented in **Fig. 6A**. Patients were classified as *Fusobacteriales*-low or high using the corresponding 75<sup>th</sup> percentile relative abundance (RA) as cut-off. Univariate Cox regression models were fitted when evaluating association between *Fusobacteriales* (high vs. low; reference low) and DFS in the whole unselected patient population (left panel). Cox regression models with an interaction term between *Fusobacteriales* (high vs. low; reference low) and gene/signature (high vs. low, reference low) and DFS were fitted to evaluate differential impact of gene/signature on clinical outcome by

Salvucci et al.

Transcriptomic-dependent *Fn/Fusobacteriales* impact.

*Fusobacteriales* (right panels). \* and \*\* denote interaction P-values lower than 0.05 and lower than or equal to 0.1, respectively.

Salvucci et al.
