# Supplementary material
Source: HighWire-hosted journal article supplement (https://gut.bmj.com/content/71/8/1600)
Supplement: inline-supplementary-material-11 [file inline-supplementary-material-11.xlsx]

## Sheet: supplementary_table_8
Supplementary Table 8
Statistical result				P-value		Coefficient
Level				Overall	Interaction	Overall	Non-mesenchymal tumours	Mesenchymal tumours
Cohort	Gene or signature	Gene or signature?	Gene or signature class
TCGA-COAD-READ	IL6	gene	Inflammation	0.006	<0.0001	0.0937356	0.478158	0.0230254
TCGA-COAD-READ	CSF2	gene	Macrophage chemotactism and activation	0.0002	<0.0001	0.125454	0.368517	0.0315503
TCGA-COAD-READ	IL1B	gene	Pro inflammation	0.0010	<0.0001	0.128777	0.409772	0.0296574
TCGA-COAD-READ	CCL8	gene	Other pathways	0.07	<0.0001	0.105744	0.433914	-0.101509
TCGA-COAD-READ	CD163	gene	Anti inflammation	0.94	0.0002	0.00311245	0.50049	-0.0654209
TCGA-COAD-READ	C5AR1	gene	Complement system	0.06	0.0003	0.125244	0.739596	0.0584441
TCGA-COAD-READ	CSF1	gene	Macrophage chemotactism and activation	0.94	0.0006	-0.00735379	0.570488	-0.283836
TCGA-COAD-READ	NOTCH2	gene	NOTCH	0.36	0.0007	0.0967706	0.585361	-0.223682
TCGA-COAD-READ	S100A9	gene	Pro inflammation	0.29	0.0008	0.028676	0.359645	0.00775874
TCGA-COAD-READ	MMP1	gene	Metallo proteins	0.004	0.0009	0.122362	0.350019	0.0315599
TCGA-COAD-READ	IL8	gene	Macrophage chemotactism and activation	<0.0001	0.001	0.130122	0.296903	0.0419313
TCGA-COAD-READ	TNFRSF9	gene	Inflammation	0.68	0.001	0.0405083	0.444928	-0.287845
TCGA-COAD-READ	S100A8	gene	Pro inflammation	0.66	0.001	0.00600138	0.287014	-0.00143467
TCGA-COAD-READ	C3AR1	gene	Complement system	0.32	0.003	0.0967931	0.597021	-0.0953415
TCGA-COAD-READ	CXCR1	gene	Macrophage chemotactism and activation	0.11	0.003	0.0518341	0.303352	0.0210555
TCGA-COAD-READ	SNAI2	gene	EMT	0.79	0.004	0.020021	0.585126	-0.0476257
TCGA-COAD-READ	NLRP3	gene	Other pathways	0.03	0.005	0.134682	0.51387	0.0616581
TCGA-COAD-READ	NFKB1	gene	Inflammation	0.13	0.005	0.187361	0.472853	-0.25693
TCGA-COAD-READ	LGALS1	gene	Immunosuppression	0.95	0.005	0.00408333	0.571901	-0.0331074
TCGA-COAD-READ	TNFSF13B	gene	Inflammation	0.85	0.006	-0.015378	0.309668	-0.198547
TCGA-COAD-READ	POSTN	gene	WNT	1.00	0.007	-6.92636e-05	0.526006	-0.026009
TCGA-COAD-READ	APOE	gene	Anti inflammation	0.45	0.008	-0.0608647	0.279878	-0.262052
TCGA-COAD-READ	C1QC	gene	Complement system	0.56	0.01	0.0506827	0.386166	-0.106719
TCGA-COAD-READ	TGFB3	gene	Immunosuppression	0.54	0.01	-0.0360745	0.375387	-0.0858638
TCGA-COAD-READ	CXCL10	gene	T cells chemotactism and activation	0.42	0.02	0.0356725	0.183385	-0.0460167
TCGA-COAD-READ	CSF1R	gene	Macrophage chemotactism and activation	0.86	0.02	0.0154074	0.461569	-0.0551388
TCGA-COAD-READ	TNFRSF18	gene	Activated T cells	0.051	0.02	0.0984931	0.382059	0.065828
TCGA-COAD-READ	COL3A1	gene	Fibroblast	0.55	0.03	-0.034849	0.447292	-0.0551141
TCGA-COAD-READ	CD68	gene	Immuno	0.66	0.03	-0.0480291	0.253112	-0.275514
TCGA-COAD-READ	ZEB2	gene	EMT	0.31	0.03	-0.0957923	0.368694	-0.208415
TCGA-COAD-READ	TIS score	signature	Inflammation signatures	0.30	0.03	0.226365	0.700398	-0.36124
TCGA-COAD-READ	C1QA	gene	Complement system	0.98	0.03	0.00235609	0.247569	-0.155916
TCGA-COAD-READ	IFNG	gene	T cells chemotactism and activation	0.15	0.04	0.0691827	0.188772	-0.0225298
TCGA-COAD-READ	IL10	gene	Immunosuppression	0.17	0.04	0.0773524	0.360102	0.0497918
TCGA-COAD-READ	MMP3	gene	Metallo proteins	<0.0001	0.04	0.248758	0.370746	0.11368
TCGA-COAD-READ	TFF2	gene	Secretion, migration and metastasis	0.32	0.04	0.00264407	0.0140988	-0.00226394
TCGA-COAD-READ	TWIST2	gene	EMT	0.32	0.04	-0.0818178	0.305159	-0.165065
TCGA-COAD-READ	CXCL9	gene	T cells chemotactism and activation	0.58	0.045	0.0346172	0.19036	-0.0757382
TCGA-COAD-READ	CSF3	gene	Macrophage chemotactism and activation	0.02	0.049	0.0590834	0.157065	0.035575
TCGA-COAD-READ	HLA-C	gene	Antigen presentation	0.97	0.052	0.00390348	0.206426	-0.196327
TCGA-COAD-READ	BMP5	gene	WNT	0.49	0.054	0.0619077	-0.0889711	0.278125
TCGA-COAD-READ	CXCL16	gene	T cells chemotactism and activation	0.14	0.054	0.172791	0.347068	-0.146856
TCGA-COAD-READ	C1QB	gene	Complement system	0.37	0.06	0.07768	0.295848	-0.055048
TCGA-COAD-READ	CXCL6	gene	Macrophage chemotactism and activation	0.03	0.06	0.091838	0.233556	0.0553402
TCGA-COAD-READ	IFN-gamma score	signature	Inflammation signatures	0.04	0.07	0.395949	0.719206	-0.0710988
TCGA-COAD-READ	CXCR2	gene	Macrophage chemotactism and activation	0.24	0.07	0.0466155	0.215536	0.020981
TCGA-COAD-READ	CFLAR	gene	Other pathways	0.27	0.08	-0.123169	0.0995878	-0.326371
TCGA-COAD-READ	CFI	gene	Complement system	0.58	0.09	0.0404206	-0.0422469	0.209497
TCGA-COAD-READ	HLA-DRA	gene	Immuno	0.89	0.10	-0.0100358	0.125605	-0.13437
TCGA-COAD-READ	HOPX	gene	Activated NK cells	0.06	0.10	-0.167517	0.107428	-0.288327
TCGA-COAD-READ	CD38	gene	Immuno	0.65	0.11	-0.0326346	0.113743	-0.164282
TCGA-COAD-READ	CFD	gene	Complement system	0.74	0.12	0.0139541	0.0893364	-0.0495301
TCGA-COAD-READ	CTSW	gene	Activated NK cells	0.77	0.14	-0.0204013	0.11427	-0.10402
TCGA-COAD-READ	FASLG	gene	Inflammation	0.33	0.15	0.0542771	0.167208	0.00135813
TCGA-COAD-READ	CD40LG	gene	Inflammation	0.41	0.16	-0.0794388	-0.221371	0.0471962
TCGA-COAD-READ	IRF1	gene	Inflammation	0.31	0.16	0.076047	0.182224	-0.0338678
TCGA-COAD-READ	TGFB1	gene	Immunosuppression	0.69	0.17	0.0376978	0.292475	-0.00983812
TCGA-COAD-READ	IL32	gene	Activated NK cells	0.26	0.17	-0.11832	0.018152	-0.291816
TCGA-COAD-READ	FABP1	gene	WNT	0.24	0.18	0.0770677	0.113742	-0.113429
TCGA-COAD-READ	Hippo score	signature	Other pathways	0.67	0.18	-0.151756	0.626011	-0.520831
TCGA-COAD-READ	ID3	gene	WNT	0.047	0.19	-0.195823	-0.27411	0.0513788
TCGA-COAD-READ	Hypoxia score	signature	Other pathways	0.63	0.20	-0.11689	0.334195	-0.40251
TCGA-COAD-READ	MMP9	gene	Metallo proteins	0.97	0.21	-0.00200062	0.131452	-0.0283422
TCGA-COAD-READ	HLA-G	gene	Antigen presentation	0.09	0.21	0.140377	0.263129	0.0575811
TCGA-COAD-READ	ENG	gene	Endothelial	0.99	0.22	-0.000756736	0.226866	-0.0376434
TCGA-COAD-READ	CXCL13	gene	B cells chemotactism and TLS	0.16	0.23	0.0756231	0.161518	0.0295668
TCGA-COAD-READ	WNT5A	gene	WNT	0.10	0.24	0.144373	0.284097	0.0633007
TCGA-COAD-READ	CCL5	gene	Activated NK cells	0.33	0.25	0.0581286	0.159011	0.0145712
TCGA-COAD-READ	TNFRSF4	gene	Activated T cells	0.51	0.25	0.0560077	0.216079	0.00620293
TCGA-COAD-READ	ID1	gene	WNT	0.46	0.26	-0.087763	-0.187366	0.210331
TCGA-COAD-READ	EMT score	signature	EMT	0.19	0.27	-0.277674	-0.809542	-0.226885
TCGA-COAD-READ	THY1	gene	Fibroblast	0.13	0.27	-0.153352	0.0981007	-0.218428
TCGA-COAD-READ	SPINK4	gene	Secretion, migration and metastasis	0.36	0.27	0.0158072	0.00392148	0.0459497
TCGA-COAD-READ	XIAP	gene	Other pathways	0.34	0.29	-0.112276	-0.200318	0.076445
TCGA-COAD-READ	PECAM1	gene	Endothelial	0.80	0.29	-0.019025	0.18941	-0.0236514
TCGA-COAD-READ	CCL21	gene	B cells chemotactism and TLS	0.24	0.29	-0.0851995	0.0849894	-0.116982
TCGA-COAD-READ	VEGFC	gene	Angiogenesis	0.23	0.30	-0.105393	0.142338	-0.135176
TCGA-COAD-READ	AGR2	gene	Cell types	<0.0001	0.31	0.283897	0.306876	0.094625
TCGA-COAD-READ	CASP1	gene	Other pathways	0.82	0.31	0.0213101	-0.0456065	0.177183
TCGA-COAD-READ	CD70	gene	Inflammation	0.84	0.32	0.00255971	-0.00895963	0.017557
TCGA-COAD-READ	MKI67	gene	Cell types	0.03	0.32	0.29116	0.362449	0.0727489
TCGA-COAD-READ	STMN1	gene	Cell cycle	0.96	0.34	0.00502413	-0.0918186	0.132989
TCGA-COAD-READ	IRF9	gene	Inflammation	0.43	0.36	-0.0984534	0.0331685	-0.216303
TCGA-COAD-READ	CFH	gene	Complement system	0.09	0.37	-0.120793	0.0172302	-0.156491
TCGA-COAD-READ	REG4	gene	Cell types	0.08	0.37	0.037318	0.0414368	-0.0276066
TCGA-COAD-READ	CSF2RA	gene	Macrophage chemotactism and activation	0.29	0.38	-0.103412	-0.0105756	-0.194317
TCGA-COAD-READ	IL6R	gene	Inflammation	0.26	0.38	-0.1288	-0.0252227	-0.241064
TCGA-COAD-READ	NOTCH1	gene	NOTCH	0.40	0.39	-0.0730114	-0.0310941	-0.214543
TCGA-COAD-READ	HLA-E	gene	Antigen presentation	0.59	0.40	0.0537094	0.172524	-0.00438212
TCGA-COAD-READ	ZEB1	gene	EMT	0.03	0.43	-0.185029	-0.0336356	-0.233977
TCGA-COAD-READ	GNLY	gene	Activated NK cells	0.03	0.44	0.086578	0.11926	0.0547624
TCGA-COAD-READ	DCN	gene	Fibroblast	0.052	0.45	-0.164381	-0.013345	-0.201277
TCGA-COAD-READ	IRF8	gene	Inflammation	0.54	0.47	-0.0695117	-0.0188134	-0.210787
TCGA-COAD-READ	CCL19	gene	B cells chemotactism and TLS	0.72	0.47	-0.00934731	-0.0519749	0.00637559
TCGA-COAD-READ	IRF5	gene	Inflammation	0.23	0.48	-0.144022	-0.0707289	-0.261191
TCGA-COAD-READ	CD24	gene	Immuno	0.01	0.49	-0.299056	-0.397771	-0.203834
TCGA-COAD-READ	C1R	gene	Complement system	0.10	0.49	-0.148877	0.0145707	-0.178359
TCGA-COAD-READ	CD3E	gene	Activated T cells	0.91	0.50	0.00900793	0.108037	-0.00769463
TCGA-COAD-READ	TNFSF8	gene	Inflammation	0.73	0.50	0.0227318	0.136349	0.0281267
TCGA-COAD-READ	GZMA	gene	Activated NK cells	0.03	0.51	0.124164	0.159061	0.0731088
TCGA-COAD-READ	C7	gene	Complement system	0.06	0.52	-0.0461325	0.0388413	-0.046256
TCGA-COAD-READ	CCR7	gene	B cells chemotactism and TLS	0.90	0.52	0.00621005	0.080331	0.00101252
TCGA-COAD-READ	TNFSF10	gene	Inflammation	0.13	0.55	-0.166657	-0.112152	-0.253682
TCGA-COAD-READ	CXCL5	gene	Macrophage chemotactism and activation	0.02	0.56	0.0285505	0.0401249	0.0244675
TCGA-COAD-READ	OLFM4	gene	Cell types	0.51	0.56	0.0327677	0.0135403	0.0930189
TCGA-COAD-READ	MAF	gene	Anti inflammation	0.36	0.59	-0.0970703	0.0474339	-0.0976243
TCGA-COAD-READ	BMP2	gene	WNT	0.15	0.59	0.134826	0.161338	0.0480951
TCGA-COAD-READ	CXCL1	gene	Macrophage chemotactism and activation	<0.0001	0.63	0.301584	0.268686	0.355863
TCGA-COAD-READ	TFF1	gene	Secretion, migration and metastasis	0.13	0.63	0.0419481	0.0355635	0.0844507
TCGA-COAD-READ	IL15	gene	T cells chemotactism and activation	0.46	0.63	0.073865	0.126916	0.0306446
TCGA-COAD-READ	CXCR5	gene	B cells chemotactism and TLS	0.65	0.64	0.0119948	-0.0116995	0.0234472
TCGA-COAD-READ	B2M	gene	Antigen presentation	0.52	0.65	0.0651419	0.120437	0.0245528
TCGA-COAD-READ	IRF6	gene	Inflammation	0.73	0.65	-0.0372768	0.00013048	-0.101746
TCGA-COAD-READ	GSDMD	gene	Inflammasome	0.12	0.66	0.141865	0.177249	0.091904
TCGA-COAD-READ	LGR5	gene	Cell types	0.59	0.68	-0.0530638	-0.0866166	0.00394395
TCGA-COAD-READ	IRF7	gene	Inflammation	0.14	0.69	0.124364	0.188799	0.120329
TCGA-COAD-READ	SLC26A3	gene	Cell types	0.12	0.69	-0.099753	-0.0866258	-0.150812
TCGA-COAD-READ	DNA damage score	signature	DNA damage	0.15	0.70	0.448393	0.309404	0.579895
TCGA-COAD-READ	IRF4	gene	Inflammation	0.53	0.71	0.0399151	0.0834926	0.0347217
TCGA-COAD-READ	C1S	gene	Complement system	0.01	0.72	-0.231996	-0.176299	-0.277388
TCGA-COAD-READ	GZMB	gene	Activated NK cells	0.14	0.73	0.100236	0.105462	0.0390345
TCGA-COAD-READ	CD7	gene	Activated T cells	0.37	0.73	0.0415796	0.0406014	0.076221
TCGA-COAD-READ	TWISTNB	gene	EMT	0.46	0.73	-0.0843662	-0.123224	-0.0321052
TCGA-COAD-READ	LTA	gene	Inflammation	0.98	0.75	-0.00239552	0.058442	0.00363661
TCGA-COAD-READ	CASP8	gene	Other pathways	0.52	0.77	-0.0711622	-0.0645934	-0.135915
TCGA-COAD-READ	IRF3	gene	Inflammation	0.43	0.77	0.0799278	0.1172	0.0582049
TCGA-COAD-READ	WNT score	signature	WNT	0.02	0.79	-1.71218	-1.47667	-1.91965
TCGA-COAD-READ	TFF3	gene	Cell types	0.003	0.79	0.211604	0.222334	0.182306
TCGA-COAD-READ	LTB	gene	Activated T cells	0.33	0.80	-0.0782965	-0.0816904	-0.0370899
TCGA-COAD-READ	NOS2	gene	Other pathways	0.0005	0.82	0.179244	0.169765	0.207985
TCGA-COAD-READ	TNF	gene	Inflammation	0.001	0.82	0.290342	0.351047	0.308772
TCGA-COAD-READ	ASCL2	gene	Cell types	0.002	0.83	-0.382547	-0.432711	-0.366734
TCGA-COAD-READ	CXCL2	gene	Macrophage chemotactism and activation	0.0001	0.84	0.316264	0.300114	0.339958
TCGA-COAD-READ	IRF2	gene	Inflammation	0.37	0.84	-0.110899	-0.11934	-0.0657424
TCGA-COAD-READ	PDGFC	gene	Angiogenesis	0.0495	0.85	-0.18524	-0.140326	-0.188771
TCGA-COAD-READ	PCNA	gene	Cell types	0.27	0.88	0.123987	0.119726	0.0777543
TCGA-COAD-READ	CXCL3	gene	Macrophage chemotactism and activation	0.0004	0.88	0.289281	0.273142	0.301241
TCGA-COAD-READ	HLA-A	gene	Antigen presentation	0.41	0.89	0.069701	0.0788224	0.102012
TCGA-COAD-READ	FRZB	gene	WNT	0.95	0.90	-0.00261955	0.00414321	-0.00872964
TCGA-COAD-READ	Proliferation score	signature	Other pathways	0.0004	0.90	1.18	1.12093	1.21603
TCGA-COAD-READ	KIAA0101	gene	Cell cycle	0.06	0.90	0.201596	0.195082	0.165155
TCGA-COAD-READ	SNAI1	gene	EMT	0.19	0.90	0.122552	0.163142	0.186447
TCGA-COAD-READ	TWIST1	gene	EMT	0.26	0.92	-0.0801072	-0.0425011	-0.0601443
TCGA-COAD-READ	HLA-B	gene	Antigen presentation	0.23	0.92	-0.125092	-0.0996673	-0.122512
TCGA-COAD-READ	CASP9	gene	Other pathways	0.65	0.93	0.050105	0.0494261	0.0714941
TCGA-COAD-READ	HLA-F	gene	Antigen presentation	0.67	0.93	0.0369733	0.0630223	0.047624
TCGA-COAD-READ	Cytolytic score	signature	Inflammation signatures	0.02	0.94	0.426566	0.494028	0.462429
TCGA-COAD-READ	SEPP1	gene	Anti inflammation	0.045	0.94	-0.166197	-0.170434	-0.15605
TCGA-COAD-READ	CASP3	gene	Other pathways	0.054	0.94	0.233585	0.21391	0.232718
TCGA-COAD-READ	Metastasis score	signature	Secretion, migration and metastasis	0.0005	0.95	0.999431	0.995544	0.958792
TCGA-COAD-READ	SPINK1	gene	Cell types	0.08	0.96	-0.164973	-0.199221	-0.184788
TCGA-COAD-READ	Stemness score	signature	Other pathways	0.15	0.98	-0.501085	-0.4196	-0.397543
TCGA-COAD-READ	DIABLO	gene	Other pathways	0.58	0.98	0.0577016	0.0516853	0.0473146
TCGA-COAD-READ	VEGFB	gene	Angiogenesis	0.02	0.99	-0.2926	-0.274097	-0.278883
Taxonomy	IL6	gene	Inflammation	0.008	0.46	0.772927	0.939893	0.466145
Taxonomy	CSF2	gene	Macrophage chemotactism and activation	0.008	0.14	0.442225	0.672139	0.0998635
Taxonomy	IL1B	gene	Pro inflammation	<0.0001	0.88	1.47404	1.50515	1.38476
Taxonomy	CCL8	gene	Other pathways	0.001	0.83	0.904777	1.05524	0.900985
Taxonomy	CD163	gene	Anti inflammation	0.15	0.50	0.411631	0.551562	0.0870285
Taxonomy	C5AR1	gene	Complement system	0.02	0.76	0.579698	0.639743	0.459667
Taxonomy	CSF1	gene	Macrophage chemotactism and activation	0.0001	0.52	1.11154	1.02434	1.50337
Taxonomy	NOTCH2	gene	NOTCH	0.98	0.15	0.0041488	0.114128	-0.686042
Taxonomy	S100A9	gene	Pro inflammation	0.10	0.17	0.343809	0.706996	0.107676
Taxonomy	MMP1	gene	Metallo proteins	<0.0001	0.85	1.55811	1.62441	1.81949
Taxonomy	IL8	gene	Macrophage chemotactism and activation	<0.0001	0.15	1.46297	1.87778	0.733568
Taxonomy	TNFRSF9	gene	Inflammation	0.78	0.33	0.0731637	-0.13086	0.431446
Taxonomy	S100A8	gene	Pro inflammation	0.004	0.16	0.680788	0.958763	0.244297
Taxonomy	C3AR1	gene	Complement system	0.23	0.74	0.333784	0.241264	0.458234
Taxonomy	CXCR1	gene	Macrophage chemotactism and activation	0.27	0.50	0.220771	0.337583	0.0732979
Taxonomy	SNAI2	gene	EMT	0.85	0.61	0.049604	0.0584851	-0.28872
Taxonomy	NLRP3	gene	Other pathways	0.009	0.87	0.575418	0.59308	0.505179
Taxonomy	NFKB1	gene	Inflammation	0.01	0.53	-0.597083	-0.661	-0.249612
Taxonomy	LGALS1	gene	Immunosuppression	0.09	0.59	0.452501	0.420496	0.866331
Taxonomy	TNFSF13B	gene	Inflammation	0.67	0.27	0.100504	-0.101813	0.54946
Taxonomy	POSTN	gene	WNT	0.15	0.24	0.432034	0.692077	-0.389112
Taxonomy	APOE	gene	Anti inflammation	0.007	0.61	0.537347	0.674234	0.450645
Taxonomy	C1QC	gene	Complement system	0.53	0.33	0.208085	-0.0534874	0.722996
Taxonomy	TGFB3	gene	Immunosuppression	0.36	0.56	0.242349	0.352636	0.00297198
Taxonomy	CXCL10	gene	T cells chemotactism and activation	0.13	0.21	0.374779	0.138327	0.85261
Taxonomy	CSF1R	gene	Macrophage chemotactism and activation	0.23	0.45	0.30229	0.422295	-0.00137411
Taxonomy	TNFRSF18	gene	Activated T cells	0.09	0.75	0.391193	0.334835	0.499733
Taxonomy	COL3A1	gene	Fibroblast	0.75	0.43	0.0799213	0.0803786	-0.620983
Taxonomy	CD68	gene	Immuno	0.009	0.82	0.734283	0.710529	0.86099
Taxonomy	ZEB2	gene	EMT	0.72	0.22	0.107338	0.27551	-0.665015
Taxonomy	TIS score	signature	Inflammation signatures	0.02	0.32	0.878134	0.593164	1.42589
Taxonomy	C1QA	gene	Complement system	0.20	0.86	0.331913	0.27239	0.371842
Taxonomy	IFNG	gene	T cells chemotactism and activation	0.03	0.26	0.462805	0.240959	0.750224
Taxonomy	IL10	gene	Immunosuppression	0.006	0.10	0.606733	0.993604	0.23573
Taxonomy	MMP3	gene	Metallo proteins	0.009	0.53	0.850782	0.708955	1.19618
Taxonomy	TFF2	gene	Secretion, migration and metastasis	0.94	0.97	0.0189787	0.0744952	0.0476322
Taxonomy	TWIST2	gene	EMT	0.33	0.08	0.192388	0.671307	-0.144857
Taxonomy	CXCL9	gene	T cells chemotactism and activation	0.09	0.36	0.476085	0.286064	0.915367
Taxonomy	CSF3	gene	Macrophage chemotactism and activation	0.0010	0.21	0.761975	0.972867	0.342177
Taxonomy	HLA-C	gene	Antigen presentation	0.64	0.53	-0.116324	0.0171935	-0.296412
Taxonomy	BMP5	gene	WNT	0.47	0.26	-0.208196	-0.432254	0.249166
Taxonomy	CXCL16	gene	T cells chemotactism and activation	0.003	0.47	0.790979	0.676179	1.14912
Taxonomy	C1QB	gene	Complement system	0.07	0.46	0.491839	0.339397	0.805812
Taxonomy	CXCL6	gene	Macrophage chemotactism and activation	0.37	0.28	0.257829	0.442595	-0.255016
Taxonomy	IFN-gamma score	signature	Inflammation signatures	0.004	0.33	0.808753	0.578903	1.20049
Taxonomy	CXCR2	gene	Macrophage chemotactism and activation	0.66	0.40	0.115938	0.255614	-0.2112
Taxonomy	CFLAR	gene	Other pathways	0.63	0.18	0.138925	0.3628	-0.605139
Taxonomy	CFI	gene	Complement system	0.07	0.10	0.472919	0.674951	-0.508795
Taxonomy	HLA-DRA	gene	Immuno	0.04	0.84	0.588837	0.545586	0.687654
Taxonomy	HOPX	gene	Activated NK cells	0.24	0.39	-0.31726	-0.388319	-1.00415
Taxonomy	CD38	gene	Immuno	0.73	0.82	-0.0820008	-0.0729283	-0.195917
Taxonomy	CFD	gene	Complement system	0.10	0.73	0.416341	0.468188	0.282435
Taxonomy	CTSW	gene	Activated NK cells	0.32	0.38	0.25085	0.457337	-0.0739577
Taxonomy	FASLG	gene	Inflammation	0.13	0.06	0.36409	-0.00163708	0.991829
Taxonomy	CD40LG	gene	Inflammation	0.93	0.59	-0.0174991	0.0523087	-0.180036
Taxonomy	IRF1	gene	Inflammation	0.01	0.39	0.599701	0.409626	0.844128
Taxonomy	TGFB1	gene	Immunosuppression	0.002	0.45	0.685502	0.571884	0.955107
Taxonomy	IL32	gene	Activated NK cells	0.60	0.002	0.130512	-0.483558	1.33925
Taxonomy	FABP1	gene	WNT	0.13	0.31	-0.387552	-0.162317	-0.697614
Taxonomy	Hippo score	signature	Other pathways	0.95	0.47	0.0328745	0.0449374	-1.0441
Taxonomy	ID3	gene	WNT	0.19	0.71	-0.381095	-0.471392	-0.217638
Taxonomy	Hypoxia score	signature	Other pathways	0.64	0.36	-0.173525	-0.0898645	-0.927805
Taxonomy	MMP9	gene	Metallo proteins	0.046	0.44	0.633902	0.820404	0.237479
Taxonomy	HLA-G	gene	Antigen presentation	0.51	0.63	-0.0823571	-0.0553113	-0.332958
Taxonomy	ENG	gene	Endothelial	0.07	0.92	0.524134	0.513388	0.581833
Taxonomy	CXCL13	gene	B cells chemotactism and TLS	0.01	0.61	0.626918	0.529565	0.807945
Taxonomy	WNT5A	gene	WNT	0.80	0.96	0.0731272	0.0198586	-0.0106845
Taxonomy	CCL5	gene	Activated NK cells	0.03	0.50	0.546048	0.412517	0.803729
Taxonomy	TNFRSF4	gene	Activated T cells	0.59	0.39	0.128451	0.255867	-0.187336
Taxonomy	ID1	gene	WNT	0.63	0.86	-0.128797	-0.0924197	-0.199214
Taxonomy	EMT score	signature	EMT	0.003	0.03	-0.598055	-0.393666	-1.86446
Taxonomy	THY1	gene	Fibroblast	0.95	0.66	-0.0159866	-0.0593935	-0.333781
Taxonomy	SPINK4	gene	Secretion, migration and metastasis	0.02	0.72	0.786375	0.817111	1.10655
Taxonomy	XIAP	gene	Other pathways	0.45	0.83	-0.164117	-0.124993	-0.241473
Taxonomy	PECAM1	gene	Endothelial	0.85	0.18	0.0442141	0.14342	-0.788382
Taxonomy	CCL21	gene	B cells chemotactism and TLS	0.57	0.02	-0.158257	0.292302	-1.32949
Taxonomy	VEGFC	gene	Angiogenesis	0.83	0.20	0.0598411	0.285424	-0.566059
Taxonomy	AGR2	gene	Cell types	0.16	0.92	0.337947	0.334292	0.388297
Taxonomy	CASP1	gene	Other pathways	0.36	0.17	0.282042	0.0298631	1.02293
Taxonomy	CD70	gene	Inflammation	0.17	1.00	0.213002	0.204745	0.206635
Taxonomy	MKI67	gene	Cell types	0.13	0.12	0.411523	0.122374	1.08538
Taxonomy	STMN1	gene	Cell cycle	0.81	0.31	-0.0553412	-0.185239	0.371499
Taxonomy	IRF9	gene	Inflammation	0.10	0.68	0.435207	0.352167	0.614719
Taxonomy	CFH	gene	Complement system	0.82	0.29	0.0589238	-0.312149	0.352558
Taxonomy	REG4	gene	Cell types	0.004	0.44	1.02262	0.89245	1.56594
Taxonomy	CSF2RA	gene	Macrophage chemotactism and activation	0.78	0.59	0.0712466	0.164335	-0.184625
Taxonomy	IL6R	gene	Inflammation	0.37	0.83	0.185326	0.158092	0.258928
Taxonomy	NOTCH1	gene	NOTCH	0.13	0.74	-0.393617	-0.478057	-0.276317
Taxonomy	HLA-E	gene	Antigen presentation	0.69	0.88	0.0918587	0.0434066	0.124106
Taxonomy	ZEB1	gene	EMT	0.10	0.16	-0.338886	-0.320082	-1.19936
Taxonomy	GNLY	gene	Activated NK cells	0.001	0.21	0.854065	0.630382	1.42533
Taxonomy	DCN	gene	Fibroblast	0.76	0.33	-0.0791285	-0.0362255	-0.68146
Taxonomy	IRF8	gene	Inflammation	0.66	0.09	-0.128463	-0.45378	0.634565
Taxonomy	CCL19	gene	B cells chemotactism and TLS	0.54	0.71	-0.135934	-0.0891629	-0.267028
Taxonomy	IRF5	gene	Inflammation	0.17	0.54	-0.379694	-0.531387	-0.172654
Taxonomy	CD24	gene	Immuno	0.43	0.30	-0.153103	-0.0708794	-0.613352
Taxonomy	C1R	gene	Complement system	0.63	0.33	-0.127025	-0.148006	-0.951057
Taxonomy	CD3E	gene	Activated T cells	0.28	0.99	0.202443	0.198868	0.195798
Taxonomy	TNFSF8	gene	Inflammation	0.74	0.13	-0.0644581	0.145905	-0.556025
Taxonomy	GZMA	gene	Activated NK cells	0.11	0.47	0.429014	0.274713	0.682942
Taxonomy	C7	gene	Complement system	0.23	0.39	-0.267376	-0.140781	-0.621158
Taxonomy	CCR7	gene	B cells chemotactism and TLS	0.81	0.20	0.0371502	0.210001	-0.222279
Taxonomy	TNFSF10	gene	Inflammation	0.70	0.70	0.0978165	0.151136	-0.0665215
Taxonomy	CXCL5	gene	Macrophage chemotactism and activation	0.02	0.65	0.746304	0.641295	0.958484
Taxonomy	OLFM4	gene	Cell types	0.83	0.20	-0.0641393	0.227288	-0.556552
Taxonomy	MAF	gene	Anti inflammation	0.47	0.41	-0.171567	-0.144808	-0.615624
Taxonomy	BMP2	gene	WNT	0.69	0.89	-0.101661	-0.132707	-0.0437071
Taxonomy	CXCL1	gene	Macrophage chemotactism and activation	0.45	0.44	0.174344	0.0490607	0.43028
Taxonomy	TFF1	gene	Secretion, migration and metastasis	0.08	0.15	0.467287	0.852025	0.0306204
Taxonomy	IL15	gene	T cells chemotactism and activation	0.62	0.55	0.13114	0.0470233	0.389242
Taxonomy	CXCR5	gene	B cells chemotactism and TLS	0.74	0.61	-0.060425	-0.129314	0.0650958
Taxonomy	B2M	gene	Antigen presentation	0.24	0.30	0.254782	0.13833	0.752559
Taxonomy	IRF6	gene	Inflammation	0.45	0.09	-0.187381	-0.0152332	-1.20162
Taxonomy	GSDMD	gene	Inflammasome	0.03	0.54	0.64032	0.502892	0.911191
Taxonomy	LGR5	gene	Cell types	0.04	0.32	-0.551684	-0.745046	-0.142839
Taxonomy	IRF7	gene	Inflammation	0.055	0.26	0.466976	0.679602	0.105705
Taxonomy	SLC26A3	gene	Cell types	0.01	0.86	-0.697721	-0.722876	-0.616209
Taxonomy	DNA damage score	signature	DNA damage	0.43	0.0501	-0.31102	-0.792979	1.00136
Taxonomy	IRF4	gene	Inflammation	0.20	0.79	0.297378	0.233635	0.354153
Taxonomy	C1S	gene	Complement system	0.38	0.37	-0.225082	-0.27996	-0.96359
Taxonomy	GZMB	gene	Activated NK cells	0.73	0.055	-0.104026	-0.432569	1.0659
Taxonomy	CD7	gene	Activated T cells	0.003	0.80	0.651579	0.599302	0.719636
Taxonomy	TWISTNB	gene	EMT	0.40	0.32	-0.205961	-0.350425	0.230393
Taxonomy	LTA	gene	Inflammation	0.44	0.62	0.132363	0.172618	-0.011208
Taxonomy	CASP8	gene	Other pathways	0.69	0.82	-0.109519	-0.113005	0.0279206
Taxonomy	IRF3	gene	Inflammation	0.051	0.045	0.519252	0.236854	1.76712
Taxonomy	WNT score	signature	WNT	0.85	0.59	-0.279142	-0.294768	-2.39365
Taxonomy	TFF3	gene	Cell types	0.96	0.049	0.0105454	0.371516	-0.471382
Taxonomy	LTB	gene	Activated T cells	0.93	0.28	-0.0216317	0.113032	-0.469373
Taxonomy	NOS2	gene	Other pathways	0.003	0.84	0.910492	0.851042	0.989842
Taxonomy	TNF	gene	Inflammation	0.26	0.56	0.315351	0.178572	0.586435
Taxonomy	ASCL2	gene	Cell types	0.0001	0.36	-0.532497	-0.613977	-0.290001
Taxonomy	CXCL2	gene	Macrophage chemotactism and activation	0.11	0.38	0.489009	0.317243	0.90436
Taxonomy	IRF2	gene	Inflammation	0.30	0.72	0.278654	0.20498	0.458413
Taxonomy	PDGFC	gene	Angiogenesis	0.10	0.20	-0.421941	-0.296725	-1.0686
Taxonomy	PCNA	gene	Cell types	0.15	0.08	-0.343415	-0.603526	0.417736
Taxonomy	CXCL3	gene	Macrophage chemotactism and activation	0.18	0.28	0.345061	0.15283	0.766403
Taxonomy	HLA-A	gene	Antigen presentation	0.92	0.50	-0.0213686	-0.0998352	0.218974
Taxonomy	FRZB	gene	WNT	0.27	0.44	-0.317189	-0.168711	-0.640681
Taxonomy	Proliferation score	signature	Other pathways	0.60	0.02	0.177753	-0.390443	1.62678
Taxonomy	KIAA0101	gene	Cell cycle	0.61	0.13	0.122017	-0.0813378	0.848337
Taxonomy	SNAI1	gene	EMT	0.08	0.97	0.481941	0.469685	0.490862
Taxonomy	TWIST1	gene	EMT	0.79	0.36	0.071736	0.155777	-0.469365
Taxonomy	HLA-B	gene	Antigen presentation	0.19	0.47	-0.234455	-0.312378	0.0747753
Taxonomy	CASP9	gene	Other pathways	0.81	0.85	0.0621031	0.0241781	0.161252
Taxonomy	HLA-F	gene	Antigen presentation	0.61	0.57	-0.124839	-0.0493062	-0.372806
Taxonomy	Cytolytic score	signature	Inflammation signatures	0.03	0.43	0.586089	0.404348	0.852822
Taxonomy	SEPP1	gene	Anti inflammation	0.02	0.01	-0.638102	-0.190472	-2.0494
Taxonomy	CASP3	gene	Other pathways	0.49	0.93	-0.169101	-0.169216	-0.224785
Taxonomy	Metastasis score	signature	Secretion, migration and metastasis	0.20	0.02	0.467023	-0.066638	2.07303
Taxonomy	SPINK1	gene	Cell types	0.18	0.12	-0.318429	-0.0841497	-0.978163
Taxonomy	Stemness score	signature	Other pathways	0.17	0.98	-0.740943	-0.962526	-0.999949
Taxonomy	DIABLO	gene	Other pathways	0.90	<0.0001	0.0311993	-0.500084	2.37268
Taxonomy	VEGFB	gene	Angiogenesis	0.03	0.63	-0.531297	-0.552057	-0.843309
Taxonomy	COX2	gene	Other pathways	0.002	0.72	-0.773642	-0.866375	-0.662282
Taxonomy	GUCA2B	gene	Cell types	0.59	0.76	-0.0751659	-0.0337265	-0.143755
Taxonomy	IL13	gene	Inflammation	0.15	0.92	0.319587	0.315387	0.361601
